# Supplementary material for: The Potential of Physical Exercise to Mitigate Radiation Damage—A Systematic Review
Source: Front Med (Lausanne). 2021 Apr 29;8:585483. doi: 10.3389/fmed.2021.585483 (PMC8117229; doi:10.3389/fmed.2021.585483)
Supplement: Supplementary Table 4 — Outcome parameters unable to be plotted on an effect size plot. [file Table_4.xlsx]

## Sheet: Table 4
Outcome parameters unable to be plotted on an effect size plot.
Article	Population	Methods	Outcome	Result
Chang 2019	Humans;	Cohort Study	Acute Coronary Events	HR = 0.27 (CI = 0.13-0.57)
	Breast Cancer Patients	(n=9135); Post		P=0.001 in favour of exercise intervention
Aghili 2007	Humans; Breast and Head/Neck Cancer Patients	Prospective, non-randomized parallel group (n=30); During	Fatigue	Mann-Whitney U = 28.5
				P=0.001 in favour of exercise intervention
